# Supplementary material for: Racial Disparity in Mechanical Thrombectomy Utilization: Multicenter Registry Results From 2016 to 2020
Source: PubMed Central journal article supplement — J Am Heart Assoc. 2022 Feb 12;11(4):e021865. doi: 10.1161/JAHA.121.021865 (PMC9245822; doi:10.1161/jaha.121.021865), 2022-02-12
Supplement: JAH3-11-e021865-s001.pdf [file JAH3-11-e021865-s001.pdf]

# **Supplemental Material**

## Data S1.

### Supplemental Methods – Missing Data Analysis

From January 2016 – September 2020, 39,645 patients presented to our network of 43 hospitals with a diagnosis of ischemic stroke or transient ischemic attack (TIA). Missing data were handled according to the methods described by Jakobsen, et al.<sup>12</sup> If the missing proportion of a data element was <5% and could be plausibly considered to be missing at random, then the missing data were ignored. The following missing data met these criteria:

| <b>Data Element</b>                   | <b>Missing, N (%)</b> |
|---------------------------------------|-----------------------|
| Race                                  | 4 (0.010)             |
| Sex                                   | 12 (0.030)            |
| Residential Zip Code                  | 279 (0.78)            |
| Median Income of Residential Zip Code | 139 (0.035)           |
| Middle Cerebral Artery Occlusion Site | 452 (1.1)             |

Race, sex and residential zip code data were missing due to lack of documentation. Residential zip code median income data were not available for patients residing outside the United States. Middle cerebral artery occlusion site was considered missing when the site of large vessel occlusion was documented as “middle cerebral artery” without specification of the occluded segment (e.g. M1, M2 or distal branch).

Missing baseline ambulatory status and presenting National Institute of Health Stroke Scale

(NIHSS) could not be ignored because the missing proportions were 10.3% (4,089/39,645) and 8.2% (3,269/39,645), respectively. These data were assumed to be missing at random, but both are known to correlate with age, race, and sex<sup>13-15</sup>. Consequently, missing values were imputed using Multiple Imputation by Chained Equations, as described by Jakobsen, et al.<sup>12</sup> Polynomial regression and predictive mean matching were used to impute missing baseline ambulatory status (categorized as “independent”, “with assistance” or “unable”) and presenting NIHSS values, respectively, with age, race and sex as covariates.

Clinical outcomes were not available for 0.82% (324/39,645) of the cohort because these patients were transferred to hospitals not included in our registry (“out-of-network transfers”). Outcome data for these patients cannot be considered missing at random, because some of these patients may have been transferred for higher-level stroke care, including mechanical thrombectomy (MT). To determine the impact of these missing data on our results, best-worst case sensitivity analysis was performed, as described by Jakobsen, et al.<sup>12</sup> First, all out-of-network transfers were assumed to have been treated with MT. Demographic and clinical variables were dichotomized and subgroups were compared with respect to rates of MT, hospital arrival within 5 hours of last known well (“early arrival”), rates of documented anterior circulation large vessel occlusion (aLVO) among early arrival patients, and rates of MT among early arrival patients with documented aLVO. Mixed effects logistic regression models were then constructed for each dependent variable using demographic and clinical variables with  $P < 0.20$  in univariable analysis as fixed effects and presenting hospital as a random effect. A  $P$ -value  $\leq 0.05$  was considered statistically significant in univariable and multivariable analyses. The analysis was then repeated

assuming no out-of-network transfers underwent MT. The results of the sensitivity analysis were as follows:

**Adjusted odds ratios of study outcomes for Black patients assuming all out-of-network transfers were treated with MT (“Best-case”)**

| <b>Outcome</b>                                                                      | <b>Adjusted Odds Ratio<br/>(95% Confidence Interval)</b> |
|-------------------------------------------------------------------------------------|----------------------------------------------------------|
| Treatment with mechanical thrombectomy                                              | 0.74 (0.54 - 0.76)                                       |
| Early arrival (within 5 hours of last known well)                                   | 0.76 (0.71 - 0.78)                                       |
| Documented anterior circulation large vessel occlusion among early arrival patients | 0.78 (0.64 - 0.95)                                       |

**Adjusted odds ratios of study outcomes for Black patients assuming no out-of-network transfers were treated with MT (“Worst-case”)**

| <b>Outcome</b>                                                                      | <b>Adjusted Odds Ratio<br/>(95% Confidence Interval)</b> |
|-------------------------------------------------------------------------------------|----------------------------------------------------------|
| Treatment with mechanical thrombectomy                                              | 0.67 (0.56 - 0.81)                                       |
| Early arrival (within 5 hours of last known well)                                   | 0.76 (0.71 - 0.81)                                       |
| Documented anterior circulation large vessel occlusion among early arrival patients | 0.78 (0.64 - 0.95)                                       |

The multivariable models for treatment with MT included the following fixed effects: race, median income of residential zip code, presentation to CSC/TSC, presenting hospital region,

presentation to high-volume stroke center, baseline ambulatory function, and stroke severity. The multivariable models for early arrival included the following fixed effects: median income and population density of residential zip code, presenting hospital region, baseline ambulatory function, stroke severity. The multivariable model of documented aLVO among early arrival patients included the following fixed effects: age, sex, median income and population density of residential zip code, presentation to CSC/TSC, presenting hospital region, presentation to high-volume stroke center, baseline ambulatory function, stroke severity. Rates of MT among early arriving patients with documented aLVO were not significantly different between Black and white patients in univariable analysis regardless of whether all out-of-network transfers were assumed to have been treated with MT (White, 66.0%; Black, 67.2%;  $P=0.75$ ) or no out-of-network transfers were assumed to have been treated with MT (White, 63.8%; Black, 64.6%;  $P=0.83$ ). Consequently, out-of-network transfers were excluded from the final analysis because our results with regards to racial disparities did not qualitatively change when all or none of these patients were assumed to have been treated with MT.

**Table S1. Demographics of hospitals contributing data to this study.**

|                                                          | <b>Ascension<br/>Providence<br/>Hospital<br/>(Mobile, AL)</b> | <b>Ascension<br/>Sacred Heart<br/>Hospital<br/>(Pensacola, FL)</b> | <b>Ascension St.<br/>Vincent's Clay<br/>County<br/>(Middleburg,<br/>FL)</b> | <b>AMITA Health<br/>Saint Joseph<br/>Medical Center<br/>(Joliet, IL)</b> |
|----------------------------------------------------------|---------------------------------------------------------------|--------------------------------------------------------------------|-----------------------------------------------------------------------------|--------------------------------------------------------------------------|
| <b>Age, mean +/- SD</b>                                  | 70.4 +/- 13.1                                                 | 69.5 +/- 14.4                                                      | 69.0 +/- 13.6                                                               | 71.5 +/- 14.7                                                            |
| <b>Sex</b>                                               |                                                               |                                                                    |                                                                             |                                                                          |
| <b>Male</b>                                              | 411 (50.2)                                                    | 728 (51.1)                                                         | 116 (52.5)                                                                  | 315 (49.2)                                                               |
| <b>Female</b>                                            | 407 (49.8)                                                    | 698 (48.9)                                                         | 105 (47.5)                                                                  | 325 (50.8)                                                               |
| <b>Race</b>                                              |                                                               |                                                                    |                                                                             |                                                                          |
| <b>White, non-Hispanic</b>                               | 652 (79.7)                                                    | 1,098 (77.0)                                                       | 191 (86.4)                                                                  | 540 (84.4)                                                               |
| <b>Black/African American</b>                            | 166 (20.3)                                                    | 328 (23.0)                                                         | 30 (13.6)                                                                   | 100 (15.6)                                                               |
| <b>Residential zip code median<br/>income &lt; \$50k</b> | 713 (87.2)                                                    | 1,073 (75.2)                                                       | 143 (64.7)                                                                  | 145 (22.7)                                                               |
| <b>Urban residential zip code</b>                        | 0 (0.0)                                                       | 2 (0.14)                                                           | 42 (19.0)                                                                   | 2 (0.31)                                                                 |
| <b>Ambulation</b>                                        |                                                               |                                                                    |                                                                             |                                                                          |
| <b>Independent</b>                                       | 747 (91.3)                                                    | 1,312 (92.0)                                                       | 202 (91.4)                                                                  | 364 (56.9)                                                               |
| <b>with Assistance</b>                                   | 37 (4.5)                                                      | 67 (4.7)                                                           | 12 (5.4)                                                                    | 254 (39.7)                                                               |
| <b>NIHSS, median (IQR)</b>                               | 3 (1.0-8.0)                                                   | 4 (1.0-10.0)                                                       | 2 (1.0-5.0)                                                                 | 3 (1.0-9.0)                                                              |
| <b>CSC or TSC</b>                                        | No                                                            | Yes                                                                | No                                                                          | Yes                                                                      |
| <b>Stroke presentations/month</b>                        | 14.4                                                          | 25.0                                                               | 3.9                                                                         | 11.2                                                                     |

|                                                          | <b>AMITA Health<br/>Saint Francis<br/>Hospital<br/>(Evanston, IL)</b> | <b>AMITA Health<br/>St. Alexius<br/>Medical Center<br/>(Hoffman<br/>Estates, IL)</b> | <b>AMITA Health<br/>Alexian Brothers<br/>Medical Center<br/>(Elk Grove, IL)</b> | <b>AMITA Health<br/>Saint Joseph<br/>Hospital<br/>(Chicago, IL)</b> |
|----------------------------------------------------------|-----------------------------------------------------------------------|--------------------------------------------------------------------------------------|---------------------------------------------------------------------------------|---------------------------------------------------------------------|
| <b>Age, mean +/- SD</b>                                  | 72.4 +/- 14.8                                                         | 72.2 +/- 13.9                                                                        | 73.0 +/- 13.7                                                                   | 75.1 +/- 14.2                                                       |
| <b>Sex</b>                                               |                                                                       |                                                                                      |                                                                                 |                                                                     |
| <b>Male</b>                                              | 104 (43.7)                                                            | 333 (49.3)                                                                           | 444 (48.1)                                                                      | 62 (44.0)                                                           |
| <b>Female</b>                                            | 134 (56.3)                                                            | 343 (50.7)                                                                           | 480 (51.9)                                                                      | 79 (56.0)                                                           |
| <b>Race</b>                                              |                                                                       |                                                                                      |                                                                                 |                                                                     |
| <b>White, non-Hispanic</b>                               | 139 (58.4)                                                            | 626 (92.6)                                                                           | 884 (95.7)                                                                      | 102 (72.3)                                                          |
| <b>Black/African American</b>                            | 99 (41.6)                                                             | 50 (7.4)                                                                             | 40 (4.3)                                                                        | 39 (27.7)                                                           |
| <b>Residential zip code median<br/>income &lt; \$50k</b> | 89 (37.4)                                                             | 94 (13.9)                                                                            | 145 (15.7)                                                                      | 24 (17.0)                                                           |
| <b>Urban residential zip code</b>                        | 167 (70.2)                                                            | 10 (1.5)                                                                             | 21 (2.3)                                                                        | 132 (93.6)                                                          |
| <b>Ambulation</b>                                        |                                                                       |                                                                                      |                                                                                 |                                                                     |
| <b>Independent</b>                                       | 188 (79.0)                                                            | 623 (92.2)                                                                           | 851 (92.1)                                                                      | 123 (87.2)                                                          |
| <b>with Assistance</b>                                   | 30 (12.6)                                                             | 27 (4.0)                                                                             | 48 (5.2)                                                                        | 14 (9.9)                                                            |
| <b>NIHSS, median (IQR)</b>                               | 3 (1.0-7.0)                                                           | 2 (1.0-6.0)                                                                          | 3 (1.0-8.0)                                                                     | 2 (1.0-6.0)                                                         |
| <b>CSC or TSC</b>                                        | No                                                                    | No                                                                                   | Yes                                                                             | No                                                                  |
| <b>Stroke presentations/month</b>                        | 4.2                                                                   | 11.9                                                                                 | 16.2                                                                            | 2.5                                                                 |

|                                                          | <b>AMITA Health<br/>Resurrection<br/>Medical Center<br/>(Chicago, IL)</b> | <b>AMITA Health<br/>Saints Mary and<br/>Elizabeth<br/>Medical Center<br/>(Chicago, IL)</b> | <b>AMITA Health<br/>Adventist<br/>Medical Center<br/>(Hinsdale, IL)</b> | <b>AMITA Health<br/>Adventist<br/>Medical Center<br/>(Glendale<br/>Heights, IL)</b> |
|----------------------------------------------------------|---------------------------------------------------------------------------|--------------------------------------------------------------------------------------------|-------------------------------------------------------------------------|-------------------------------------------------------------------------------------|
| <b>Age, mean +/- SD</b>                                  | 75.1 +/- 14.3                                                             | 66.8 +/- 12.5                                                                              | 76.4 +/- 13.8                                                           | 72.0 +/- 14.4                                                                       |
| <b>Sex</b>                                               |                                                                           |                                                                                            |                                                                         |                                                                                     |
| <b>Male</b>                                              | 323 (51.2)                                                                | 79 (58.1)                                                                                  | 273 (45.9)                                                              | 116 (46.4)                                                                          |
| <b>Female</b>                                            | 308 (48.8)                                                                | 57 (41.9)                                                                                  | 322 (54.1)                                                              | 134 (53.6)                                                                          |
| <b>Race</b>                                              |                                                                           |                                                                                            |                                                                         |                                                                                     |
| <b>White, non-Hispanic</b>                               | 600 (95.1)                                                                | 42 (30.9)                                                                                  | 559 (93.9)                                                              | 217 (86.8)                                                                          |
| <b>Black/African American</b>                            | 31 (4.9)                                                                  | 94 (69.1)                                                                                  | 36 (6.1)                                                                | 33 (13.2)                                                                           |
| <b>Residential zip code median<br/>income &lt; \$50k</b> | 65 (10.3)                                                                 | 65 (47.8)                                                                                  | 280 (47.1)                                                              | 49 (19.6)                                                                           |
| <b>Urban residential zip code</b>                        | 382 (60.5)                                                                | 123 (90.4)                                                                                 | 15 (2.5)                                                                | 4 (1.6)                                                                             |
| <b>Ambulation</b>                                        |                                                                           |                                                                                            |                                                                         |                                                                                     |
| <b>Independent</b>                                       | 571 (90.5)                                                                | 120 (88.2)                                                                                 | 543 (91.3)                                                              | 226 (90.4)                                                                          |
| <b>with Assistance</b>                                   | 43 (6.8)                                                                  | 6 (4.4)                                                                                    | 21 (3.5)                                                                | 14 (5.6)                                                                            |
| <b>NIHSS, median (IQR)</b>                               | 2 (1.0-6.0)                                                               | 2 (1.0-6.0)                                                                                | 1 (0.0-5.0)                                                             | 4 (1.0-10.0)                                                                        |
| <b>CSC or TSC</b>                                        | Yes                                                                       | No                                                                                         | No                                                                      | No                                                                                  |
| <b>Stroke presentations/month</b>                        | 11.1                                                                      | 2.4                                                                                        | 10.4                                                                    | 4.4                                                                                 |



|                                                          | <b>AMITA Health<br/>Adventist Medical<br/>Center<br/>(La Grange, IL)</b> | <b>AMITA Health<br/>Adventist<br/>Medical Center<br/>(Bolingbrook,<br/>IL)</b> | <b>Ascension St.<br/>Vincent Hospital<br/>(Evansville, IN)</b> | <b>Ascension St.<br/>Vincent Hospital<br/>(Indianapolis,<br/>IN)</b> |
|----------------------------------------------------------|--------------------------------------------------------------------------|--------------------------------------------------------------------------------|----------------------------------------------------------------|----------------------------------------------------------------------|
| <b>Age, mean +/- SD</b>                                  | 75.9 +/- 13.5                                                            | 70.3 +/- 15.1                                                                  | 70.4 +/- 14.3                                                  | 72.1 +/- 14.6                                                        |
| <b>Sex</b>                                               |                                                                          |                                                                                |                                                                |                                                                      |
| <b>Male</b>                                              | 290 (46.6)                                                               | 173 (45.1)                                                                     | 444 (49.2)                                                     | 916 (45.7)                                                           |
| <b>Female</b>                                            | 332 (53.4)                                                               | 211 (54.9)                                                                     | 459 (50.8)                                                     | 1,088 (54.3)                                                         |
| <b>Race</b>                                              |                                                                          |                                                                                |                                                                |                                                                      |
| <b>White, non-Hispanic</b>                               | 581 (93.4)                                                               | 295 (76.8)                                                                     | 807 (89.4)                                                     | 1,466 (73.2)                                                         |
| <b>Black/African American</b>                            | 41 (6.6)                                                                 | 89 (23.2)                                                                      | 96 (10.6)                                                      | 538 (26.8)                                                           |
| <b>Residential zip code median<br/>income &lt; \$50k</b> | 266 (42.8)                                                               | 32 (8.3)                                                                       | 756 (83.7)                                                     | 1,430 (71.4)                                                         |
| <b>Urban residential zip code</b>                        | 27 (4.3)                                                                 | 5 (1.3)                                                                        | 0 (0.0)                                                        | 36 (1.8)                                                             |
| <b>Ambulation</b>                                        |                                                                          |                                                                                |                                                                |                                                                      |
| <b>Independent</b>                                       | 576 (92.6)                                                               | 353 (91.9)                                                                     | 859 (95.1)                                                     | 1,860 (92.8)                                                         |
| <b>with Assistance</b>                                   | 26 (4.2)                                                                 | 9 (2.3)                                                                        | 31 (3.4)                                                       | 62 (3.1)                                                             |
| <b>NIHSS, median (IQR)</b>                               | 2 (0.0-5.0)                                                              | 2 (0.0-7.0)                                                                    | 3 (1.0-7.0)                                                    | 3 (1.0-8.0)                                                          |
| <b>CSC or TSC</b>                                        | No                                                                       | No                                                                             | No                                                             | Yes                                                                  |
| <b>Stroke presentations/month</b>                        | 10.9                                                                     | 6.7                                                                            | 15.8                                                           | 35.2                                                                 |

|                                                          | <b>Ascension St.<br/>Vincent Anderson<br/>Regional Hospital<br/>(Anderson, IN)</b> | <b>Ascension Via<br/>Christi St.<br/>Francis Hospital<br/>(Wichita, KS)</b> | <b>Ascension Via<br/>Christi St.<br/>Joseph Hospital<br/>(Wichita, KS)</b> | <b>St. Agnes<br/>Hospital<br/>(Baltimore, MD)</b> |
|----------------------------------------------------------|------------------------------------------------------------------------------------|-----------------------------------------------------------------------------|----------------------------------------------------------------------------|---------------------------------------------------|
| <b>Age, mean +/- SD</b>                                  | 71.1 +/- 14.5                                                                      | 71.9 +/- 14.5                                                               | 67.5 +/- 14.1                                                              | 70.9 +/- 14.7                                     |
| <b>Sex</b>                                               |                                                                                    |                                                                             |                                                                            |                                                   |
| <b>Male</b>                                              | 278 (45.7)                                                                         | 786 (47.9)                                                                  | 71 (49.3)                                                                  | 850 (46.8)                                        |
| <b>Female</b>                                            | 330 (54.3)                                                                         | 854 (52.1)                                                                  | 73 (50.7)                                                                  | 967 (53.2)                                        |
| <b>Race</b>                                              |                                                                                    |                                                                             |                                                                            |                                                   |
| <b>White, non-Hispanic</b>                               | 547 (90.0)                                                                         | 1,448 (88.3)                                                                | 113 (78.5)                                                                 | 837 (46.1)                                        |
| <b>Black/African American</b>                            | 61 (10.0)                                                                          | 192 (11.7)                                                                  | 31 (21.5)                                                                  | 980 (53.9)                                        |
| <b>Residential zip code median<br/>income &lt; \$50k</b> | 570 (93.8)                                                                         | 1,474 (89.9)                                                                | 142 (98.6)                                                                 | 1,286 (70.8)                                      |
| <b>Urban residential zip code</b>                        | 0 (0.0)                                                                            | 1 (0.061)                                                                   | 0 (0.0)                                                                    | 776 (42.7)                                        |
| <b>Ambulation</b>                                        |                                                                                    |                                                                             |                                                                            |                                                   |
| <b>Independent</b>                                       | 543 (89.3)                                                                         | 1,507 (91.9)                                                                | 139 (96.5)                                                                 | 1,585 (87.2)                                      |
| <b>with Assistance</b>                                   | 44 (7.2)                                                                           | 66 (4.0)                                                                    | 3 (2.1)                                                                    | 166 (9.1)                                         |
| <b>NIHSS, median (IQR)</b>                               | 3 (1.0-8.0)                                                                        | 5 (2.0-11.0)                                                                | 2 (1.0-4.0)                                                                | 3 (1.0-6.0)                                       |
| <b>CSC or TSC</b>                                        | No                                                                                 | Yes                                                                         | No                                                                         | No                                                |
| <b>Stroke presentations/month</b>                        | 10.7                                                                               | 28.8                                                                        | 2.5                                                                        | 31.9                                              |

|                                                      | <b>Ascension Saint Mary's Hospital (Livonia, MI)</b> | <b>Ascension Macomb Oakland Hospital (Warren, MI)</b> | <b>Ascension St. John Hospital and Medical Center (Detroit, MI)</b> | <b>Ascension Genesys Hospital (Grand Blanc, MI)</b> |
|------------------------------------------------------|------------------------------------------------------|-------------------------------------------------------|---------------------------------------------------------------------|-----------------------------------------------------|
| <b>Age, mean +/- SD</b>                              | 69.8 +/- 13.7                                        | 69.2 +/- 14.9                                         | 67.3 +/- 14.9                                                       | 71.7 +/- 14.0                                       |
| <b>Sex</b>                                           |                                                      |                                                       |                                                                     |                                                     |
| <b>Male</b>                                          | 339 (49.1)                                           | 389 (48.3)                                            | 749 (48.4)                                                          | 853 (47.3)                                          |
| <b>Female</b>                                        | 351 (50.9)                                           | 417 (51.7)                                            | 797 (51.6)                                                          | 951 (52.7)                                          |
| <b>Race</b>                                          |                                                      |                                                       |                                                                     |                                                     |
| <b>White, non-Hispanic</b>                           | 550 (79.7)                                           | 600 (74.4)                                            | 623 (40.3)                                                          | 1,682 (93.2)                                        |
| <b>Black/African American</b>                        | 140 (20.3)                                           | 206 (25.6)                                            | 923 (59.7)                                                          | 122 (6.8)                                           |
| <b>Residential zip code median income &lt; \$50k</b> | 563 (81.6)                                           | 678 (84.1)                                            | 1,156 (74.8)                                                        | 1,183 (65.6)                                        |
| <b>Urban residential zip code</b>                    | 0 (0.0)                                              | 63 (7.8)                                              | 748 (48.4)                                                          | 1 (0.055)                                           |
| <b>Ambulation</b>                                    |                                                      |                                                       |                                                                     |                                                     |
| <b>Independent</b>                                   | 614 (89.0)                                           | 737 (91.4)                                            | 1,417 (91.7)                                                        | 1,720 (95.3)                                        |
| <b>with Assistance</b>                               | 56 (8.1)                                             | 40 (5.0)                                              | 100 (6.5)                                                           | 47 (2.6)                                            |
| <b>NIHSS, median (IQR)</b>                           | 3 (1.0-7.0)                                          | 3 (1.0-6.0)                                           | 4 (1.0-8.0)                                                         | 3 (1.0-8.0)                                         |
| <b>CSC or TSC</b>                                    | Yes                                                  | No                                                    | Yes                                                                 | No                                                  |
| <b>Stroke presentations/month</b>                    | 12.1                                                 | 14.1                                                  | 27.1                                                                | 31.6                                                |

|                                                          | <b>Ascension<br/>Providence<br/>Rochester Hospital<br/>(Rochester Hills,<br/>MI)</b> | <b>Ascension<br/>Borgess Allegan<br/>Hospital<br/>(Allegan, MI)</b> | <b>Ascension<br/>Providence<br/>Hospital<br/>(Southfield, MI)</b> | <b>Ascension<br/>Providence<br/>Hospital<br/>(Novi, MI)</b> |
|----------------------------------------------------------|--------------------------------------------------------------------------------------|---------------------------------------------------------------------|-------------------------------------------------------------------|-------------------------------------------------------------|
| <b>Age, mean +/- SD</b>                                  | 74.0 +/- 14.7                                                                        | 70.6 +/- 14.7                                                       | 69.0 +/- 13.7                                                     | 73.0 +/- 14.0                                               |
| <b>Sex</b>                                               |                                                                                      |                                                                     |                                                                   |                                                             |
| <b>Male</b>                                              | 186 (49.2)                                                                           | 14 (48.3)                                                           | 278 (42.3)                                                        | 292 (50.7)                                                  |
| <b>Female</b>                                            | 192 (50.8)                                                                           | 15 (51.7)                                                           | 379 (57.7)                                                        | 284 (49.3)                                                  |
| <b>Race</b>                                              |                                                                                      |                                                                     |                                                                   |                                                             |
| <b>White, non-Hispanic</b>                               | 358 (94.7)                                                                           | 29 (100.0)                                                          | 68 (10.4)                                                         | 526 (91.3)                                                  |
| <b>Black/African American</b>                            | 20 (5.3)                                                                             | 0 (0.0)                                                             | 589 (89.6)                                                        | 50 (8.7)                                                    |
| <b>Residential zip code median<br/>income &lt; \$50k</b> | 274 (72.5)                                                                           | 6 (20.7)                                                            | 623 (94.8)                                                        | 178 (30.9)                                                  |
| <b>Urban residential zip code</b>                        | 4 (1.1)                                                                              | 0 (0.0)                                                             | 287 (43.7)                                                        | 11 (1.9)                                                    |
| <b>Ambulation</b>                                        |                                                                                      |                                                                     |                                                                   |                                                             |
| <b>Independent</b>                                       | 354 (93.7)                                                                           | 26 (89.7)                                                           | 600 (91.3)                                                        | 531 (92.2)                                                  |
| <b>with Assistance</b>                                   | 15 (4.0)                                                                             | 1 (3.5)                                                             | 37 (5.6)                                                          | 28 (4.9)                                                    |
| <b>NIHSS, median (IQR)</b>                               | 2 (0.0-5.0)                                                                          | 2 (0.0-5.0)                                                         | 3 (1.0-6.0)                                                       | 2 (1.0-5.0)                                                 |
| <b>CSC or TSC</b>                                        | No                                                                                   | No                                                                  | Yes                                                               | Yes                                                         |
| <b>Stroke presentations/month</b>                        | 6.6                                                                                  | 0.51                                                                | 11.5                                                              | 10.1                                                        |

|                                                      | <b>Our Lady of Lourdes Memorial Hospital (Binghamton, NY)</b> | <b>Ascension St. John Medical Center (Tulsa, OK)</b> | <b>Ascension St. Thomas Rutherford Hospital (Murfreesboro, TN)</b> | <b>Ascension St. Thomas Midtown Hospital (Nashville, TN)</b> |
|------------------------------------------------------|---------------------------------------------------------------|------------------------------------------------------|--------------------------------------------------------------------|--------------------------------------------------------------|
| <b>Age, mean +/- SD</b>                              | 74.7 +/- 13.0                                                 | 72.1 +/- 13.3                                        | 68.8 +/- 13.9                                                      | 67.5 +/- 13.6                                                |
| <b>Sex</b>                                           |                                                               |                                                      |                                                                    |                                                              |
| <b>Male</b>                                          | 336 (47.6)                                                    | 1,327 (48.2)                                         | 614 (48.2)                                                         | 409 (48.0)                                                   |
| <b>Female</b>                                        | 370 (52.4)                                                    | 1,424 (51.8)                                         | 661 (51.8)                                                         | 443 (52.0)                                                   |
| <b>Race</b>                                          |                                                               |                                                      |                                                                    |                                                              |
| <b>White, non-Hispanic</b>                           | 671 (95.0)                                                    | 2,398 (87.2)                                         | 1,108 (86.9)                                                       | 431 (50.6)                                                   |
| <b>Black/African American</b>                        | 35 (5.0)                                                      | 353 (12.8)                                           | 167 (13.1)                                                         | 421 (49.4)                                                   |
| <b>Residential zip code median income &lt; \$50k</b> | 587 (83.1)                                                    | 1,934 (70.3)                                         | 1,120 (87.8)                                                       | 753 (88.4)                                                   |
| <b>Urban residential zip code</b>                    | 0 (0.0)                                                       | 1,297 (47.1)                                         | 10 (0.78)                                                          | 504 (59.2)                                                   |
| <b>Ambulation</b>                                    |                                                               |                                                      |                                                                    |                                                              |
| <b>Independent</b>                                   | 451 (63.9)                                                    | 2,527 (91.9)                                         | 1,185 (92.9)                                                       | 789 (92.6)                                                   |
| <b>with Assistance</b>                               | 221 (31.3)                                                    | 126 (4.6)                                            | 57 (4.5)                                                           | 33 (3.9)                                                     |
| <b>NIHSS, median (IQR)</b>                           | 2 (0.0-5.0)                                                   | 4 (1.0-10.0)                                         | 3 (1.0-6.0)                                                        | 3 (1.0-6.0)                                                  |
| <b>CSC or TSC</b>                                    | No                                                            | Yes                                                  | Yes                                                                | Yes                                                          |
| <b>Stroke presentations/month</b>                    | 12.4                                                          | 48.3                                                 | 22.4                                                               | 14.9                                                         |

|                                                          | <b>Ascension St.<br/>Thomas West<br/>Hospital (Nashville,<br/>TN)</b> | <b>Seton Medical<br/>Center<br/>(Round Rock,<br/>TX)</b> | <b>Seton Medical<br/>Center<br/>(Austin, TX)</b> | <b>Dell Seton<br/>Medical Center<br/>(Austin, TX)</b> |
|----------------------------------------------------------|-----------------------------------------------------------------------|----------------------------------------------------------|--------------------------------------------------|-------------------------------------------------------|
| <b>Age, mean +/- SD</b>                                  | 72.7 +/- 13.2                                                         | 70.6 +/- 14.3                                            | 72.4 +/- 15.1                                    | 67.4 +/- 15.3                                         |
| <b>Sex</b>                                               |                                                                       |                                                          |                                                  |                                                       |
| <b>Male</b>                                              | 674 (50.0)                                                            | 349 (45.7)                                               | 585 (48.9)                                       | 381 (54.7)                                            |
| <b>Female</b>                                            | 675 (50.0)                                                            | 414 (54.3)                                               | 611 (51.1)                                       | 316 (45.3)                                            |
| <b>Race</b>                                              |                                                                       |                                                          |                                                  |                                                       |
| <b>White, non-Hispanic</b>                               | 1,221 (90.5)                                                          | 666 (87.3)                                               | 1,031 (86.2)                                     | 506 (72.6)                                            |
| <b>Black/African American</b>                            | 128 (9.5)                                                             | 97 (12.7)                                                | 165 (13.8)                                       | 191 (27.4)                                            |
| <b>Residential zip code median<br/>income &lt; \$50k</b> | 1,124 (83.3)                                                          | 494 (64.7)                                               | 1,061 (88.7)                                     | 583 (83.6)                                            |
| <b>Urban residential zip code</b>                        | 510 (37.8)                                                            | 29 (3.8)                                                 | 880 (73.6)                                       | 439 (63.0)                                            |
| <b>Ambulation</b>                                        |                                                                       |                                                          |                                                  |                                                       |
| <b>Independent</b>                                       | 1,244 (92.2)                                                          | 699 (91.6)                                               | 1,046 (87.5)                                     | 662 (95.0)                                            |
| <b>with Assistance</b>                                   | 72 (5.3)                                                              | 49 (6.4)                                                 | 101 (8.4)                                        | 28 (4.0)                                              |
| <b>NIHSS, median (IQR)</b>                               | 4 (1.0-9.0)                                                           | 3 (1.0-9.0)                                              | 3 (1.0-8.0)                                      | 5 (2.0-10.0)                                          |
| <b>CSC or TSC</b>                                        | Yes                                                                   | Yes                                                      | Yes                                              | Yes                                                   |
| <b>Stroke presentations/month</b>                        | 23.7                                                                  | 13.4                                                     | 21.0                                             | 12.2                                                  |

|                                                      | <b>Seton Medical Center<br/>(Kyle, TX)</b> | <b>Ascension Columbia St. Mary's Hospital<br/>(Milwaukee, WI)</b> | <b>Ascension Columbia St. Mary's Hospital<br/>(Mequon, WI)</b> | <b>Ascension St. Joseph Hospital<br/>(Milwaukee, WI)</b> |
|------------------------------------------------------|--------------------------------------------|-------------------------------------------------------------------|----------------------------------------------------------------|----------------------------------------------------------|
| <b>Age, mean +/- SD</b>                              | 69.3 +/- 13.4                              | 69.5 +/- 15.0                                                     | 78.8 +/- 12.0                                                  | 63.4 +/- 14.2                                            |
| <b>Sex</b>                                           |                                            |                                                                   |                                                                |                                                          |
| <b>Male</b>                                          | 233 (50.3)                                 | 404 (46.2)                                                        | 244 (50.5)                                                     | 237 (48.4)                                               |
| <b>Female</b>                                        | 230 (49.7)                                 | 470 (53.8)                                                        | 239 (49.5)                                                     | 253 (51.6)                                               |
| <b>Race</b>                                          |                                            |                                                                   |                                                                |                                                          |
| <b>White, non-Hispanic</b>                           | 418 (90.3)                                 | 340 (38.9)                                                        | 430 (89.0)                                                     | 75 (15.3)                                                |
| <b>Black/African American</b>                        | 45 (9.7)                                   | 534 (61.1)                                                        | 53 (11.0)                                                      | 415 (84.7)                                               |
| <b>Residential zip code median income &lt; \$50k</b> | 424 (91.6)                                 | 613 (70.1)                                                        | 152 (31.5)                                                     | 468 (95.5)                                               |
| <b>Urban residential zip code</b>                    | 24 (5.2)                                   | 806 (92.2)                                                        | 132 (27.3)                                                     | 487 (99.4)                                               |
| <b>Ambulation</b>                                    |                                            |                                                                   |                                                                |                                                          |
| <b>Independent</b>                                   | 422 (91.1)                                 | 789 (90.3)                                                        | 471 (97.5)                                                     | 465 (94.9)                                               |
| <b>with Assistance</b>                               | 27 (5.8)                                   | 54 (6.2)                                                          | 9 (1.9)                                                        | 11 (2.2)                                                 |
| <b>NIHSS, median (IQR)</b>                           | 2 (0.0-5.0)                                | 4 (1.0-8.0)                                                       | 2 (1.0-6.0)                                                    | 4 (2.0-8.0)                                              |
| <b>CSC or TSC</b>                                    | No                                         | Yes                                                               | No                                                             | No                                                       |
| <b>Stroke presentations/month</b>                    | 8.1                                        | 15.3                                                              | 8.5                                                            | 8.6                                                      |

|                                                          | <b>Ascension<br/>Southeast<br/>Wisconsin Hospital<br/>(Elmbrook, WI)</b> | <b>Ascension<br/>Southeast<br/>Wisconsin<br/>Hospital<br/>(Franklin, WI)</b> | <b>Ascension All<br/>Saints Hospital<br/>(Racine, WI)</b> |
|----------------------------------------------------------|--------------------------------------------------------------------------|------------------------------------------------------------------------------|-----------------------------------------------------------|
| <b>Age, mean +/- SD</b>                                  | 78.9 +/- 12.2                                                            | 73.9 +/- 12.1                                                                | 72.4 +/- 14.0                                             |
| <b>Sex</b>                                               |                                                                          |                                                                              |                                                           |
| <b>Male</b>                                              | 134 (38.6)                                                               | 65 (60.2)                                                                    | 460 (49.8)                                                |
| <b>Female</b>                                            | 213 (61.4)                                                               | 43 (39.8)                                                                    | 464 (50.2)                                                |
| <b>Race</b>                                              |                                                                          |                                                                              |                                                           |
| <b>White, non-Hispanic</b>                               | 332 (95.7)                                                               | 107 (99.1)                                                                   | 715 (77.4)                                                |
| <b>Black/African American</b>                            | 15 (4.3)                                                                 | 1 (0.93)                                                                     | 209 (22.6)                                                |
| <b>Residential zip code median<br/>income &lt; \$50k</b> | 255 (73.5)                                                               | 65 (60.2)                                                                    | 875 (94.7)                                                |
| <b>Urban residential zip code</b>                        | 67 (19.3)                                                                | 14 (13.0)                                                                    | 3 (0.32)                                                  |
| <b>Ambulation</b>                                        |                                                                          |                                                                              |                                                           |
| <b>Independent</b>                                       | 318 (91.6)                                                               | 102 (94.4)                                                                   | 827 (89.5)                                                |
| <b>with Assistance</b>                                   | 20 (5.8)                                                                 | 3 (2.8)                                                                      | 54 (5.8)                                                  |
| <b>NIHSS, median (IQR)</b>                               | 2 (0.0-6.0)                                                              | 1 (0.0-3.0)                                                                  | 4 (1.0-9.0)                                               |
| <b>CSC or TSC</b>                                        | No                                                                       | No                                                                           | No                                                        |
| <b>Stroke presentations/month</b>                        | 6.1                                                                      | 1.9                                                                          | 16.2                                                      |



**Table S2. Overall mechanical thrombectomy rates by demographic and clinical subgroup.**

|                                          | <b>N (%)</b> | <b>P-value</b> |
|------------------------------------------|--------------|----------------|
| Age, years                               |              | 0.66           |
| Age < 80                                 | 817 (3.5)    |                |
| Age ≥ 80                                 | 373 (3.4)    |                |
| Sex                                      |              | 0.43           |
| Male                                     | 560 (3.4)    |                |
| Female                                   | 630 (3.5)    |                |
| Race/ethnicity                           |              | <0.01          |
| White, Non-Hispanic                      | 957 (3.6)    |                |
| African American/Black                   | 233 (2.9)    |                |
| Residential zip code median income       |              | <0.01          |
| > \$50,000                               | 331 (3.1)    |                |
| < \$50,000                               | 859 (3.6)    |                |
| Residential zip code population density  |              | 0.80           |
| Urban                                    | 281 (3.5)    |                |
| Non-urban                                | 909 (3.4)    |                |
| Presenting hospital stroke certification |              | <0.01          |
| CSC/TSC                                  | 961 (4.7)    |                |
| PSC                                      | 229 (1.6)    |                |
| Presenting hospital region               |              | <0.01          |
| Midwest                                  | 775 (3.7)    |                |
| South                                    | 356 (3.8)    |                |
| East                                     | 59 (1.4)     |                |
| Hospital stroke volume                   |              | <0.01          |
| High                                     | 1,136 (3.7)  |                |
| Low                                      | 54 (1.4)     |                |

|                     | <b>N (%)</b> | <b>P-value</b> |
|---------------------|--------------|----------------|
| Baseline Ambulation |              | <0.01          |
| Independent         | 1,126 (3.6)  |                |
| with Assistance     | 46 (2.1)     |                |
| Stroke severity     |              | <0.01          |
| NIHSS $\leq$ 5      | 172 (0.8)    |                |
| NIHSS > 5           | 1,018 (8.8)  |                |

CSC, Comprehensive Stroke Center; MT, mechanical thrombectomy; NIHSS, National Institute of Health Stroke Scale; PSC, Primary Stroke Center; TSC, Thrombectomy-capable Stroke Center.

**Table S3. Rates of early arrival (within 5 hours of last known well) by demographic and clinical subgroup.**

|                                          | <b>N (%)</b>  | <b>P-value</b> |
|------------------------------------------|---------------|----------------|
| Age, years                               |               | <0.01          |
| Age < 80                                 | 7,627 (32.4)  |                |
| Age ≥ 80                                 | 3,848 (34.8)  |                |
| Sex                                      |               | 0.70           |
| Male                                     | 5,546 (33.3)  |                |
| Female                                   | 5,929 (33.1)  |                |
| Race/ethnicity                           |               | <0.01          |
| White, Non-Hispanic                      | 9,289 (34.9)  |                |
| African American/Black                   | 2,186 (27.5)  |                |
| Residential zip code median income       |               | <0.01          |
| > \$50,000                               | 3,651 (34.5)  |                |
| < \$50,000                               | 7,824 (32.6)  |                |
| Residential zip code population density  |               | <0.01          |
| Urban                                    | 2,506 (31.1)  |                |
| Non-urban                                | 8,969 (33.8)  |                |
| Presenting hospital stroke certification |               | 0.53           |
| CSC/TSC                                  | 6,770 (33.3)  |                |
| PSC                                      | 4,705 (33.0)  |                |
| Presenting hospital region               |               | <0.01          |
| Midwest                                  | 7,164 (33.9)  |                |
| South                                    | 3,160 (33.9)  |                |
| East                                     | 1,151 (27.6)  |                |
| Hospital stroke volume                   |               | 0.23           |
| High                                     | 10,178 (33.1) |                |
| Low                                      | 1,297 (34.0)  |                |

|                     | <b>N (%)</b>  | <b>P-value</b> |
|---------------------|---------------|----------------|
| Baseline Ambulation |               | 0.02           |
| Independent         | 10,455 (33.4) |                |
| with Assistance     | 673 (31.0)    |                |
| Stroke severity     |               | <0.01          |
| NIHSS $\leq$ 5      | 6,971 (30.2)  |                |
| NIHSS > 5           | 4,504 (39.1)  |                |

CSC, Comprehensive Stroke Center; MT, mechanical thrombectomy; NIHSS, National Institute of Health Stroke Scale; PSC, Primary Stroke Center; TSC, Thrombectomy-capable Stroke Center.

**Table S4. Rates of documented anterior circulation large vessel occlusion among early arrival patients**

|                                          | <b>N (%)</b> | <b>P-value</b> |
|------------------------------------------|--------------|----------------|
| Age, years                               |              | <0.01          |
| Age < 80                                 | 698 (9.2)    |                |
| Age ≥ 80                                 | 414 (10.8)   |                |
| Sex                                      |              | <0.01          |
| Male                                     | 478 (8.6)    |                |
| Female                                   | 634 (10.7)   |                |
| Race/ethnicity                           |              | 0.05           |
| White, Non-Hispanic                      | 924 (9.9)    |                |
| African American/Black                   | 188 (8.6)    |                |
| Residential zip code median income       |              | <0.01          |
| > \$50,000                               | 306 (8.4)    |                |
| < \$50,000                               | 806 (10.3)   |                |
| Residential zip code population density  |              | 0.14           |
| Urban                                    | 262 (10.5)   |                |
| Non-urban                                | 850 (9.5)    |                |
| Presenting hospital stroke certification |              | <0.01          |
| CSC/TSC                                  | 906 (13.4)   |                |
| PSC                                      | 206 (4.4)    |                |
| Presenting hospital region               |              | <0.01          |
| Midwest                                  | 615 (8.6)    |                |
| South                                    | 429 (13.6)   |                |
| East                                     | 68 (5.9)     |                |
| Hospital stroke volume                   |              | <0.01          |
| High                                     | 1,051 (10.3) |                |
| Low                                      | 61 (4.7)     |                |

|                     | <b>N (%)</b> | <b>P-value</b> |
|---------------------|--------------|----------------|
| Baseline Ambulation |              | <0.01          |
| Independent         | 1,035 (9.9)  |                |
| with Assistance     | 44 (6.5)     |                |
| Stroke severity     |              | <0.01          |
| NIHSS $\leq$ 5      | 181 (2.6)    |                |
| NIHSS > 5           | 931 (20.7)   |                |

CSC, Comprehensive Stroke Center; MT, mechanical thrombectomy; NIHSS, National Institute of Health Stroke Scale; PSC, Primary Stroke Center; TSC, Thrombectomy-capable Stroke Center.

**Table S5. Rates of mechanical thrombectomy among early arrival patients with documented anterior circulation large vessel occlusion.**

|                                          | <b>N (%)</b> | <b>P-value</b> |
|------------------------------------------|--------------|----------------|
| Age, years                               |              | <0.01          |
| Age < 80                                 | 476 (68.2)   |                |
| Age ≥ 80                                 | 250 (60.4)   |                |
| Sex                                      |              | 0.45           |
| Male                                     | 318 (66.5)   |                |
| Female                                   | 408 (64.4)   |                |
| Race/ethnicity                           |              | 0.83           |
| White, Non-Hispanic                      | 602 (65.2)   |                |
| African American/Black                   | 124 (66.0)   |                |
| Residential zip code median income       |              | 0.12           |
| > \$50,000                               | 204 (66.7)   |                |
| < \$50,000                               | 522 (64.8)   |                |
| Residential zip code population density  |              |                |
| Urban                                    | 158 (60.3)   | 0.05           |
| Non-urban                                | 568 (66.8)   |                |
| Presenting hospital stroke certification |              |                |
| CSC/TSC                                  | 594 (65.6)   | 0.69           |
| PSC                                      | 132 (64.1)   |                |
| Presenting hospital region               |              | <0.01          |
| Midwest                                  | 448 (72.8)   |                |
| South                                    | 247 (57.6)   |                |
| East                                     | 31 (45.6)    |                |
| Hospital stroke volume                   |              |                |
| High                                     | 693 (65.9)   | 0.06           |
| Low                                      | 33 (54.1)    |                |

|                     | <b>N (%)</b> | <b>P-value</b> |
|---------------------|--------------|----------------|
| Baseline Ambulation |              | 0.10           |
| Independent         | 690 (66.7)   |                |
| with Assistance     | 24 (54.5)    |                |
| Stroke severity     |              | <0.01          |
| NIHSS $\leq$ 5      | 70 (38.7)    |                |
| NIHSS > 5           | 656 (70.5)   |                |

CSC, Comprehensive Stroke Center; MT, mechanical thrombectomy; NIHSS, National Institute of Health Stroke Scale; PSC, Primary Stroke Center; TSC, Thrombectomy-capable Stroke Center.
